# Supplementary material for: HLA-G Polymorphisms Are Associated with Non-Segmental Vitiligo among Brazilians
Source: Biomolecules. 2019 Sep 9;9(9):463. doi: 10.3390/biom9090463 (PMC6769860; doi:10.3390/biom9090463)
Supplement: Supplementary file 1 [file biomolecules-09-00463-s001.xlsx]

## Sheet: Sheet1
Table S1: HLA-G variants detected in a Brazilian sample of vitiligo patients and non-vitiligo controls, and their frequencies in three population groups from the 1000 Genomes dataset.
CHROM	hg38	hg19	IMGT/HLA	SNPid	Reference allele	Vitiligo (2n=100)	Control (2n=786)	Africans (2n=1008)	European (2n=808)	East Asians (2n=1008)
6	29825210	29792987	-2635	rs542428384	T	1	0.998728	1	0.998762	1
6	29825212	29792989	-2633	.	C	1	0.997455	0	0	0
6	29825213	29792990	-2632	.	T	1	0.997455	0	0	0
6	29825214	29792991	-2631	.	A	1	0.997455	0	0	0
6	29825219	29792996	-2626	rs1632950	C	0.64	0.650127	0.739087	0.655941	0.690476
6	29825244	29793021	-2601	rs1736942	A	0.67	0.698473	0.743056	0.717822	0.887897
6	29825383	29793160	-2462	rs190164389	T	1	0.996183	1	0.997525	1
6	29825385	29793162	-2460	rs150426937	A	0.96	0.922392	0.888889	0.97401	0.992063
6	29825447	29793224	-2398	rs114251653	C	0.96	0.922392	0.888889	0.97401	0.992063
6	29825532	29793309	-2313	rs9278332	TA	0.99	0.975827	0.987103	0.97896	0.997024
6	29825533	29793310	-2312	rs1736941	A	0.54	0.510178	0.512897	0.580446	0.401786
6	29825585	29793362	-2260	rs1736940	G	0.48	0.416031	0.388889	0.537129	0.390873
6	29825588	29793365	-2257	rs72838218	G	0.88	0.846056	0.760913	0.907178	0.708333
6	29825608	29793385	-2237	rs1736939	G	0.64	0.638677	0.739087	0.655941	0.690476
6	29825627	29793404	-2218	rs142798055	CTCT	0.92	0.884224	0.760913	0.907178	0.708333
6	29825683	29793460	-2162	rs9461563	T	0.96	0.922392	0.888889	0.97401	0.992063
6	29825726	29793503	-2119	rs146027593	T	1	0.997455	0.996032	0.99505	0.999008
6	29825800	29793577	-2045	.	T	1	0.998728	0	0	0
6	29825804	29793581	-2041	rs1233335	C	0.97	0.966921	0.917659	0.956683	0.982143
6	29825813	29793590	-2032	rs1736938	A	0.52	0.494911	0.500992	0.568069	0.399802
6	29825833	29793610	-2012	rs72492280	G	0.88	0.842239	0.760913	0.907178	0.708333
6	29825853	29793630	-1992	rs9258492	T	0.99	0.977099	0.987103	0.97896	0.997024
6	29825873	29793650	-1972	rs182479069	C	1	0.997455	0.997024	1	1
6	29825947	29793724	-1898	rs1632949	T	0.64	0.650127	0.739087	0.655941	0.690476
6	29826099	29793876	-1746	rs1736937	C	0.64	0.650127	0.739087	0.655941	0.690476
6	29826165	29793942	-1680	rs138915780	T	1	0.991094	1	0.993812	0.999008
6	29826231	29794008	-1614	rs142134285	C	1	0.993639	0.944444	1	1
6	29826272	29794049	-1573	rs1632948	T	0.49	0.417303	0.388889	0.537129	0.390873
6	29826320	29794097	-1525	.	T	1	0.998728	0	0	0
6	29826369	29794146	-1476	rs114252012	C	0.98	0.989822	0.982143	0.99505	0.998016
6	29826439	29794216	-1406	rs527969449	AGT	0.98	0.992366	1	0.992574	1
6	29826468	29794245	-1377	rs113076482	T	1	0.994911	0.983135	1	1
6	29826540	29794317	-1305	rs1736936	G	0.52	0.496183	0.500992	0.568069	0.399802
6	29826666	29794443	-1179	rs1736935	A	0.48	0.414758	0.388889	0.537129	0.390873
6	29826690	29794467	-1155	rs3823321	G	0.88	0.842239	0.760913	0.907178	0.708333
6	29826705	29794482	-1140	rs1736934	A	0.64	0.650127	0.739087	0.655941	0.690476
6	29826707	29794484	-1138	rs17875389	A	0.96	0.922392	0.888889	0.97401	0.992063
6	29826724	29794501	-1121	rs3115630	T	0.05	0.0445293	0.000992063	0.0829208	0.00198413
6	29826747	29794524	-1098	rs146374870	G	1	0.989822	1	1	1
6	29826772	29794549	-1073	rs192232623	G	1	0.998728	1	0.998762	1
6	29826881	29794658	-964	rs1632947	G	0.52	0.492366	0.5	0.563119	0.39881
6	29826923	29794700	-922	rs370338057	C	1	0.994911	1	0.996287	1
6	29827066	29794843	-779	rs547123392	C	1	0.998728	1	0.998762	1
6	29827083	29794860	-762	rs1632946	C	0.52	0.492366	0.5	0.563119	0.39881
6	29827120	29794897	-725	rs1233334	G	0.1	0.108142	0.0605159	0.157178	0.015873
6	29827129	29794906	-716	rs2249863	T	0.52	0.491094	0.5	0.563119	0.396825
6	29827156	29794933	-689	rs2735022	A	0.52	0.491094	0.5	0.563119	0.396825
6	29827179	29794956	-666	rs35674592	G	0.52	0.491094	0.5	0.563119	0.396825
6	29827199	29794976	-646	rs17875391	A	0.97	0.966921	0.91369	0.993812	0.998016
6	29827212	29794989	-633	rs1632944	G	0.52	0.491094	0.5	0.563119	0.396825
6	29827644	29795421	-201	rs1233333	G	0.52	0.492366	0.5	0.563119	0.396825
6	29827789	29795566	-56	rs17875397	C	0.96	0.922392	0.888889	0.97401	0.992063
6	29827859	29795636	15	rs1630223	G	0.52	0.492366	0.5	0.563119	0.396825
6	29827880	29795657	36	rs1630185	G	0.52	0.492366	0.5	0.563119	0.396825
6	29827943	29795720	99	rs56388903	A	0.11	0.119593	0.107143	0.158416	0.0238095
6	29827970	29795747	126	rs6932888	G	0.68	0.739186	0.821429	0.664604	0.652778
6	29827974	29795751	130	rs6932596	C	0.68	0.739186	0.821429	0.664604	0.652778
6	29827991	29795768	147	rs1629329	T	0.48	0.414758	0.388889	0.537129	0.388889
6	29828032	29795809	188	rs1628628	C	0.55	0.538168	0.500992	0.62005	0.593254
6	29828136	29795913	292	rs41551813	A	0.96	0.922392	0.888889	0.97401	0.992063
6	29828150	29795927	306	rs72558174	G	1	0.997455	1	0.991337	1
6	29828168	29795945	324	rs9258495	G	0.99	0.997455	1	0.998762	0.998016
6	29828210	29795987	366	rs78627024	G	0.99	1	0.982143	0.998762	1
6	29828216	29795993	372	rs1130355	G	0.52	0.492366	0.5	0.563119	0.396825
6	29828342	29796119	498	rs201510147	G	1	0.997455	0.999008	0.99505	0.999008
6	29828375	29796152	531	rs1625907	G	0.59	0.48855	0.457341	0.561881	0.388889
6	29828457	29796234	613	rs9278333	CA	0.52	0.492366	0.502976	0.563119	0.397817
6	29828470	29796247	626	rs542016267	C	1	0.994911	1	0.998762	1
6	29828480	29796257	636	rs1625035	C	0.48	0.414758	0.388889	0.535891	0.389881
6	29828488	29796265	644	rs17875401	G	0.96	0.922392	0.888889	0.97401	0.992063
6	29828529	29796306	685	rs1624337	G	0.52	0.492366	0.502976	0.563119	0.396825
6	29828550	29796327	706	rs1130356	C	0.68	0.698473	0.743056	0.717822	0.885913
6	29828571	29796348	727	rs79303923	C	1	0.994911	0.994048	0.997525	1
6	29828592	29796369	748	rs3873252	A	0.97	0.954198	1	0.943069	0.804563
6	29828599	29796376	755	rs12722477	C	0.88	0.842239	0.760913	0.907178	0.714286
6	29828657	29796434	813	rs41557518	AC	0.95	0.970738	0.924603	0.986386	0.985119
6	29828715	29796492	871	rs17875402	G	1	0.994911	0.986111	1	1
6	29828775	29796552	931	rs775166796	C	0.99	1	0	0	0
6	29828860	29796637	1016	rs17875403	C	0.98	0.997455	0.979167	0.993812	1
6	29828863	29796640	1019	rs1632942	T	0.48	0.414758	0.388889	0.537129	0.389881
6	29829434	29797211	1590	rs41562616	C	0.96	0.922392	0.888889	0.97401	0.992063
6	29829643	29797420	1799	rs12722482	C	0.96	0.940204	0.99504	0.94802	0.986111
6	29829671	29797448	1827	rs17875406	G	0.94	0.942748	0.826389	0.980198	1
6	29829776	29797553	1932	rs1632937	G	0.52	0.492366	0.5	0.563119	0.397817
6	29829793	29797570	1949	.	C	1	0.998728	0	0	0
6	29829862	29797639	2018	rs1049033	C	0.68	0.722646	0.755952	0.738861	0.890873
6	29829919	29797696	2075	rs1130363	A	0.48	0.414758	0.388889	0.537129	0.389881
6	29830363	29798140	2519	rs915667	A	0.53	0.515267	0.509921	0.584158	0.402778
6	29830600	29798377	2756	rs111781429	T	1	0.991094	1	1	0.999008
6	29830642	29798419	2798	rs915670	G	0.68	0.722646	0.755952	0.738861	0.890873
6	29830648	29798425	2804	rs915669	G	0.48	0.414758	0.388889	0.537129	0.389881
6	29830682	29798459	2838	rs915668	C	0.48	0.414758	0.388889	0.537129	0.389881
6	29830804	29798581	14-bp +/-	rs371194629	DEL	0.61	0.577608	0.626984	0.631188	0.681548
6	29830831	29798608	3001	rs567747015	C	1	0.989822	0.975198	1	1
6	29830833	29798610	3003	rs1707	C	0.09	0.119593	0.0892857	0.157178	0.0238095
6	29830840	29798617	3010	rs1710	G	0.48	0.414758	0.388889	0.537129	0.389881
6	29830857	29798634	3027	rs17179101	C	0.97	0.954198	1	0.943069	0.804563
6	29830862	29798639	3032	rs146339774	G	1	0.998728	0.997024	0.998762	1
6	29830865	29798642	3035	rs17179108	C	0.93	0.871501	0.884921	0.909653	0.795635
6	29830882	29798659	3052	rs569057854	C	1	0.997455	0.997024	1	1
6	29830951	29798728	3121	rs138249160	T	1	0.997455	0.999008	0.99505	0.999008
6	29830972	29798749	3142	rs1063320	C	0.48	0.416031	0.388889	0.537129	0.389881
6	29831017	29798794	3187	rs9380142	A	0.65	0.737913	0.800595	0.667079	0.650794
6	29831026	29798803	3196	rs1610696	C	0.66	0.701018	0.743056	0.717822	0.885913
6	29831057	29798834	3227	rs1233331	G	0.98	0.983461	0.981151	0.960396	1
